# Supplementary material
Source: ML conference proceedings conference paper supplement (https://openaccess.thecvf.com/content/ICCV2025/html/Akada_Bring_Your_Rear_ICCV_2025_paper.html)
Supplement: Supplementary file 1 [file Akada_Bring_Your_Rear_ICCV_2025_supplemental.pdf]

# Bring Your Rear Cameras for Egocentric 3D Human Pose Estimation

## Supplementary Material

This supplementary material provides more details about our work. **Please also watch our supplementary video for dynamic visualizations, including the proposed datasets, qualitative results, and character animations as a future application of our method.**

### A. Per-Action Evaluation

Table 6 presents the 3D error evaluation for each action category on Ego4View-RW. Our refinement method consistently brings substantial improvement across all action types. Notably, our proposed module demonstrates superior effectiveness, particularly for motions involving lower-body movements, achieving a 15.5% improvement in “stretching legs”. This enhancement is likely attributed to the frequent self-occlusion of the legs in either front or rear views, which often leads to misrepresentation in joint detection by the current state-of-the-art method [4] even with four-view inputs. In contrast, our module effectively mitigates these challenges, resulting in significant advancements in egocentric 3D human pose estimation with rear-view integration.

### B. Joint Visibility Calculation

As described in Sec. 3, we obtain the visibility of end-effector joints (hands and feet) in our synthetic setup. We first generate 2D egocentric fisheye views using SMPL models with the predefined body part segmentation mesh [3]. Next, we project ground-truth 3D joints onto these images to obtain reference points, querying the nearest 2D points within a  $10 \times 10$  pixel region around each reference. We classify a 3D joint as visible if any queried 2D point corresponds to its respective body part; otherwise, it is considered occluded.

### C. Additional Details of Network Architecture

As mentioned in Sec. 4, we use several shallow networks, *i.e.*,  $\mathcal{F}_O$ ,  $\mathcal{F}_R$ ,  $\mathcal{F}_{HM}$ ,  $\mathcal{P}_{HM}$ ,  $\mathcal{P}_{RGB}$ , and  $\mathcal{P}_Q$ .  $\mathcal{F}_O$  and  $\mathcal{F}_R$  consist of two linear layers with a bilinear up-sample operation as well as with an intermediate dimension size of 64 and 128, respectively.  $\mathcal{F}_{HM}$  uses one convolutional layer with a kernel size of 3, a stride of 2, and a padding size of 1, followed by two linear layers with an intermediate dimension size of 256, a bilinear up-sample operation, and a linear layer to generate heatmaps.  $\mathcal{P}_{HM}$  is composed of two linear layers with intermediate and output dimension sizes of 256 whereas  $\mathcal{P}_{RGB}$  and  $\mathcal{P}_Q$  are a single liner layer with output dimension size of 256.

| Method  | walking                  | kicking               | boxing             | crouching     |
|---------|--------------------------|-----------------------|--------------------|---------------|
| EPF [4] | 45.16                    | 74.50                 | 71.22              | 50.89         |
| + Ours  | <b>42.10</b>             | <b>68.85</b>          | <b>60.81</b>       | <b>46.20</b>  |
| Method  | kneeing                  | crawling              | dancing            | twisting body |
| EPF [4] | 87.14                    | 82.35                 | 52.99              | 61.64         |
| + Ours  | <b>73.69</b>             | <b>76.92</b>          | <b>48.75</b>       | <b>56.03</b>  |
| Method  | stretching arms          | stretching legs       | rotating shoulders | raising legs  |
| EPF [4] | 50.03                    | 58.14                 | 53.56              | 75.62         |
| + Ours  | <b>46.88</b>             | <b>49.09</b>          | <b>51.94</b>       | <b>68.91</b>  |
| Method  | balancing legs up behind | sitting on the ground | all                |               |
| EPF [4] | 82.82                    | 77.19                 | 63.38              |               |
| + Ours  | <b>74.24</b>             | <b>66.79</b>          | <b>56.94</b>       |               |

Table 6. **Per-action evaluation on Ego4View-RW** (MPJPE) with 2 front and 2 rear views. EPF represents EgoPoseFormer [4].

### D. Rear-View Integration for Existing Method

As mentioned in Secs. 4 and 5, the refined heatmap features  $\mathbf{R}_k$  and heatmaps  $\tilde{\mathbf{H}}_k$  can be utilised with existing 2D-to-3D lifting modules to estimate 3D poses. In this work, we integrate our module into the current state-of-the-art methods, EgoPoseFormer [4] and EgoTAP [2]. However, unlike the 3D module of EgoTAP [2] that directly uses heatmaps as inputs, EgoPoseFormer [4] uses the heatmap features (before the final heatmap output layer) instead of the heatmaps in their 2D-to-3D lifting module. To account for their methodology, we first input the refined features  $\mathbf{R}_k$  from all views into a simple network consisting of four convolutional layers followed by a linear layer, yielding an initial 3D pose  $\mathbf{P} \in \mathbb{R}^{16 \times 3}$ , which represents 16 joints including the head. This initial 3D pose is subsequently fed into the 3D updating module of EgoPoseFormer [4] to produce an updated 3D pose  $\mathbf{P}_{\text{final}}$  as the final output.

### E. Model Size

Here, we provide the details of our model size and inference speed with 2 front and 2 rear views. As mentioned in Sec. 4 and 5, we adopt the current state-of-the-art methods as a baseline, *i.e.*, EgoPoseFormer [1] (27M parameters) and EgoTAP [2] (242M parameters), with our refinement module ( $25\text{M} \times \text{the number of views}$ ). Note that EgoPoseFormer [1] consists of a simple UNet-based architecture and three transformer-based layers; therefore, they tend to have

fewer trainable parameters than EgoTAP [2].

Regarding the inference speed on our setup with a single NVIDIA Quadro RTX 8000 and PyTorch, while the original EgoPoseFormer [1] runs at 67 fps, EgoPoseFormer with our refinement module can run at 30 fps with 2 front and 2 rear views. Therefore, our method can be utilized with real-time applications. Note that our focus lies in making the best use of rear views and prioritizes tracking accuracy; future work will improve inference speed with our proposed setup and novel large-scale datasets, *i.e.*, Ego4View-Syn and Ego4View-RW.

## References

- [1] Jiayi Jiang, Paul Streli, Manuel Meier, and Christian Holz. Egoposer: Robust real-time egocentric pose estimation from sparse and intermittent observations everywhere. In *European Conference on Computer Vision (ECCV)*, 2024. [1](#), [2](#)
- [2] Taeho Kang and Youngki Lee. Attention-propagation network for egocentric heatmap to 3d pose lifting. In *Computer Vision and Pattern Recognition (CVPR)*, 2024. [1](#), [2](#)
- [3] Matthew Loper, Naureen Mahmood, Javier Romero, Gerard Pons-Moll, and Michael J. Black. SMPL: A skinned multi-person linear model. *ACM Trans. Graphics (Proc. SIGGRAPH Asia)*, 34(6):248:1–248:16, 2015. [1](#)
- [4] Chenhongyi Yang, Anastasia Tkach, Shreyas Hampali, Linguang Zhang, Elliot J Crowley, and Cem Keskin. Egopose-former: A simple baseline for stereo egocentric 3d human pose estimation. In *European conference on computer vision*, 2024. [1](#)
